# Supplementary material for: Epidemiology study of HBV genotypes and antiviral drug resistance in multi-ethnic regions from Western China
Source: PubMed Central journal article supplement (PMC4661727; doi:10.1038/srep17413), 2015-11-27
Supplement: srep17413-s1.pdf [file srep17413-s1.pdf]

**Epidemiology study of HBV genotypes and antiviral drug resistance  
in multi-ethnic regions from Western China**

Qi Zhang<sup>#</sup>, Yun Liao<sup>#</sup>, Jie Chen, Bei Cai, Zhenzhen Su, Binwu Ying, Xiaojun Lu,  
Chuanmin Tao, Lanlan Wang\*

Department of Laboratory Medicine, West China Hospital, Sichuan University,  
Chengdu, 610041, China

\*Corresponding Author: Lanlan Wang

Department of Laboratory Medicine, West China Hospital, Sichuan University, No.37  
Guoxue Alley, Wuhou district, Chengdu 610041, People's Republic of China

E-mail: lanlanwang2014@126.com

Tel: 86-28-85422751; Fax: 86-28-85422751

<sup>#</sup>, Qi Zhang and Yun Liao contributed equally to this work

## **Supplementary legends**

Supplementary Table S1. HBV genotypes and clinical characteristics in Han population

Supplementary Table S2. Geographic and demographic distribution of HBV antiviral resistant rate in Western China

Supplementary Table S3. HBV genotypes and antiviral resistance in Han population

Supplementary Table S4. The prevalence of mutations in different HBV genotypes in lamivudine-resistance Sichuan Han patients

Supplementary Table S5. The prevalence of mutations in different HBV genotypes in telbivudine-resistant Sichuan Han patients

Supplementary Table S6. The prevalence of mutations in different HBV genotypes in adefovir-resistant Sichuan Han patients

Supplementary Table S7. The prevalence of mutations in different HBV genotypes in entecavir-resistant Sichuan Han patients

**Supplementary Table S1. HBV genotypes and clinical characteristics in Han population**

|                                          | genotype B      | genotype C      | P value              |
|------------------------------------------|-----------------|-----------------|----------------------|
| n                                        | 409             | 230             |                      |
| Age                                      | 34.90±10.218    | 37.34±10.334    | 0.004 <sup>a,*</sup> |
| Male % (n/N)                             | 80.4% (329/409) | 80.4% (185/230) | 0.999 <sup>b</sup>   |
| HBV-DNA<br>(log <sub>10</sub> copies/ml) | 5.43±1.49       | 5.21±1.52       | 0.25 <sup>a</sup>    |
| TB (μmol/L)                              | 40.62±67.35     | 43.37±77.68     | 0.76 <sup>a</sup>    |
| DB (μmol/L)                              | 24.86±51.49     | 26.00±55.74     | 0.86 <sup>a</sup>    |
| ALT (IU/L)                               | 222.00±437.41   | 180.48±325.65   | 0.40 <sup>a</sup>    |
| AST (IU/L)                               | 152.58±337.50   | 136.58±270.38   | 0.68 <sup>a</sup>    |
| ALB (g/L)                                | 43.19±7.51      | 43.52±6.34      | 0.71 <sup>a</sup>    |
| GLB (g/L)                                | 30.00±5.58      | 30.70±5.10      | 0.29 <sup>a</sup>    |
| ALP (IU/L)                               | 94.73±45.29     | 104.15±53.63    | 0.12 <sup>a</sup>    |
| GGT (IU/L)                               | 53.51±65.05     | 64.27±75.02     | 0.21 <sup>a</sup>    |

Note: \*, statistically significant; Continuous variables were described as mean±SD.

Table abbreviations: TB, total bilirubin; DB, direct bilirubin; ALT, alanine aminotransferase; AST, aspartame aminotransferase; ALB, albumin; GLB, globulin; ALP, alkaline phosphatase; GGT, gamma glutamyl transpeptidase

<sup>a</sup>Student's *t* test, two-sided.

<sup>b</sup> $\chi^2$  test, two-sided.

**Supplementary Table S2. Geographic and demographic distribution of HBV antiviral resistant rate in Western China**

| Ethnic population | LMV   | LdT   | ADV   | ETV  | Total |
|-------------------|-------|-------|-------|------|-------|
| Sichuan Hans      | 43.5% | 38.1% | 13.4% | 4.2% | 47.5% |
| Sichuan Yis       | 17.4% | 17.4% | 6.5%  | 0.0% | 23.9% |
| Qinghai Tibetans  | 14.3% | 4.8%  | 4.8%  | 0.0% | 19.0% |
| Xinjiang Hans     | 16.7% | 0.0%  | 0.0%  | 0.0% | 16.7% |
| Xinjiang Uygurs   | 8.7%  | 2.2%  | 0.0%  | 0.0% | 8.7%  |
| Tibet Tibetans    | 4.4%  | 0.0%  | 0.0%  | 0.0% | 4.4%  |
| Sichuan Tibetans  | 3.2%  | 0.0%  | 0.0%  | 0.0% | 3.2%  |

Note: LMV, lamivudine; LdT, telbivudine; ADV, adefovir; ETV, entecavir.

**Supplementary Table S3. HBV genotypes and antiviral resistance in Han population**

|                      | LMV<br>resistance<br>n (%) | LdT<br>resistance<br>n (%) | ADV<br>resistance<br>n (%) | ETV<br>resistance<br>n (%) | Overall<br>resistant rate<br>n (%) |
|----------------------|----------------------------|----------------------------|----------------------------|----------------------------|------------------------------------|
| B (n=409)            | 172(42.1%)                 | 153(37.4%)                 | 39(9.5%)                   | 19(4.7%)                   | 192(46.9%)                         |
| C (n=230)            | 106(46.1%)                 | 91(39.6%)                  | 46(20.0%)                  | 8(3.5%)                    | 112(48.7%)                         |
| P value <sup>a</sup> | 0.324                      | 0.590                      | 0.000*                     | 0.481                      | 0.670                              |

Note: \*, statistically significant; LMV, lamivudine; LdT, telbivudine; ADV, adefovir; ETV, entecavir.

<sup>a</sup> $\chi^2$  test, two-sided.

**Supplementary Table S4. The prevalence of mutations in different HBV genotypes in lamivudine-resistance Sichuan Han patients**

|          | rtV173L<br>N(%)    | rtL180M<br>N(%)      | rtA181V/T/S<br>N(%)  | rtM204V<br>N(%)    | rtM204I<br>N(%)    | rtV207M/I/L<br>N(%) | rtS213T<br>N(%)    |
|----------|--------------------|----------------------|----------------------|--------------------|--------------------|---------------------|--------------------|
| B(N=172) | 3(1.7%)            | 62(36.1%)            | 18(10.5%)            | 52(30.2%)          | 96(55.8%)          | 10(5.8%)            | 9(5.2%)            |
| C(N=106) | 4(3.8%)            | 58(54.7%)            | 31(29.3%)            | 23(21.7%)          | 50(47.2%)          | 8(7.6%)             | 5(4.7%)            |
| p value  | 0.433 <sup>a</sup> | 0.002 <sup>b,*</sup> | 0.000 <sup>b,*</sup> | 0.119 <sup>b</sup> | 0.161 <sup>b</sup> | 0.568 <sup>b</sup>  | 0.849 <sup>b</sup> |

Note: \*, statistically significant.

<sup>a</sup>Fisher's exact test, two-sided.

<sup>b</sup> $\chi^2$  test, two-sided.

**Supplementary Table S5. The prevalence of mutations in different HBV genotypes in telbivudine-resistant Sichuan Han patients**

|          | rtV173L<br>N(%)    | rtL180M<br>N(%)      | rtT184A/I/S<br>N(%) | rtS202G<br>N(%)    | rtM204V<br>N(%)    | rtM204I<br>N(%)    | rtM250L<br>N(%)    |
|----------|--------------------|----------------------|---------------------|--------------------|--------------------|--------------------|--------------------|
| B(N=153) | 3(1.9%)            | 62(40.5%)            | 5(3.3%)             | 9(5.9%)            | 48(31.4%)          | 96(62.8%)          | 2(1.3%)            |
| C(N=91)  | 4(4.4%)            | 58(63.7%)            | 5(5.5%)             | 1(1.1%)            | 22(24.2%)          | 50(54.9%)          | 0(0.0%)            |
| P value  | 0.429 <sup>a</sup> | 0.000 <sup>b,*</sup> | 0.507 <sup>a</sup>  | 0.096 <sup>b</sup> | 0.229 <sup>b</sup> | 0.229 <sup>b</sup> | 0.530 <sup>a</sup> |

Note: \*, statistically significant.

<sup>a</sup>Fisher's exact test, two-sided.

<sup>b</sup> $\chi^2$  test, two-sided.

**Supplementary Table S6. The prevalence of mutations in different HBV genotypes in adefovir-resistant Sichuan Han patients**

|                      | rtA181V/T/S<br>N(%) | rtN236T<br>N(%) |
|----------------------|---------------------|-----------------|
| B(N=39)              | 21(53.9%)           | 26(66.7%)       |
| C(N=46)              | 18(39.1%)           | 6(13.0%)        |
| P value <sup>a</sup> | 0.175               | 0.000*          |

Note: \*, statistically significant.

<sup>a</sup> $\chi^2$  test, two-sided.

**Supplementary Table S7. The prevalence of mutations in different HBV genotypes in entecavir-resistant Sichuan Han patients**

|                      | rtL180M<br>N(%) | rtT184A/I/S/L<br>N(%) | rtS202G<br>N(%) | rtM204V<br>N(%) | rtM204I<br>N(%) | rtM204V/I<br>N(%) | rtM250L<br>N(%) |
|----------------------|-----------------|-----------------------|-----------------|-----------------|-----------------|-------------------|-----------------|
| B(N=18)              | 17(94.4%)       | 8(44.4%)              | 9(50.0%)        | 15(83.3%)       | 2(11.1%)        | 1(5.6%)           | 2(11.1%)        |
| C(N=6)               | 6(100%)         | 5(83.3%)              | 1(16.7%)        | 4(66.7%)        | 1(16.7%)        | 1(16.7%)          | 0 (0.0%)        |
| P value <sup>a</sup> | 1.000           | 0.166                 | 0.341           | 0.394           | 1.000           | 0.446             | 1.000           |

Note: <sup>a</sup>Fisher's exact test, two-sided.
